# Supplementary material for: Amorphous RuCoP Ultrafine Nanoparticles Supported on Carbon as Efficient Catalysts for Hydrogenation of Adipic Acid to 1,6-Hexanediol
Source: MDPI journal article supplement (doi:10.3390/ma15228084), 2022-11-15
Supplement: s1 [file s1]

# Amorphous RuCoP ultrafine nanoparticles supported on carbon as efficient catalysts for hydrogenation of adipic acid to 1,6-hexanediol

Wei Gong <sup>1</sup>, Xuyun Wang <sup>1,\*</sup>, Shan Ji <sup>2</sup> and Hui Wang <sup>1,\*</sup>

<sup>1</sup> State Key Laboratory Base for Eco-Chemical Engineering, College of Chemical Engineering, Qingdao University of Science and Technology, Qingdao 266042, China

<sup>2</sup> College of Biological, Chemical Science and Chemical Engineering, Jiaying University, Jiaying 314001, China

\* Correspondence: wangxy@qust.edu.cn (X.W.); wangh@qust.edu.cn (H.W.)

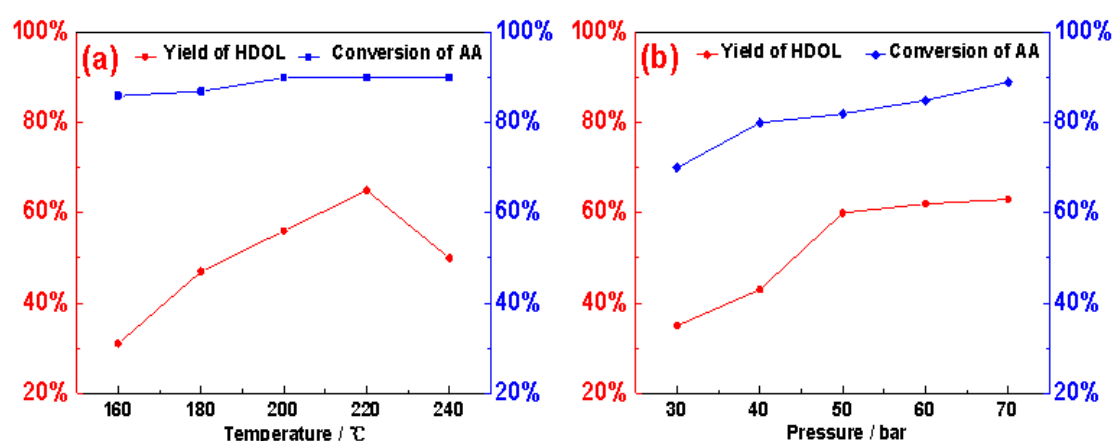

Figure S1. Effect of temperature (a) and pressure (b) on AA conversion and HDOL selectivity.

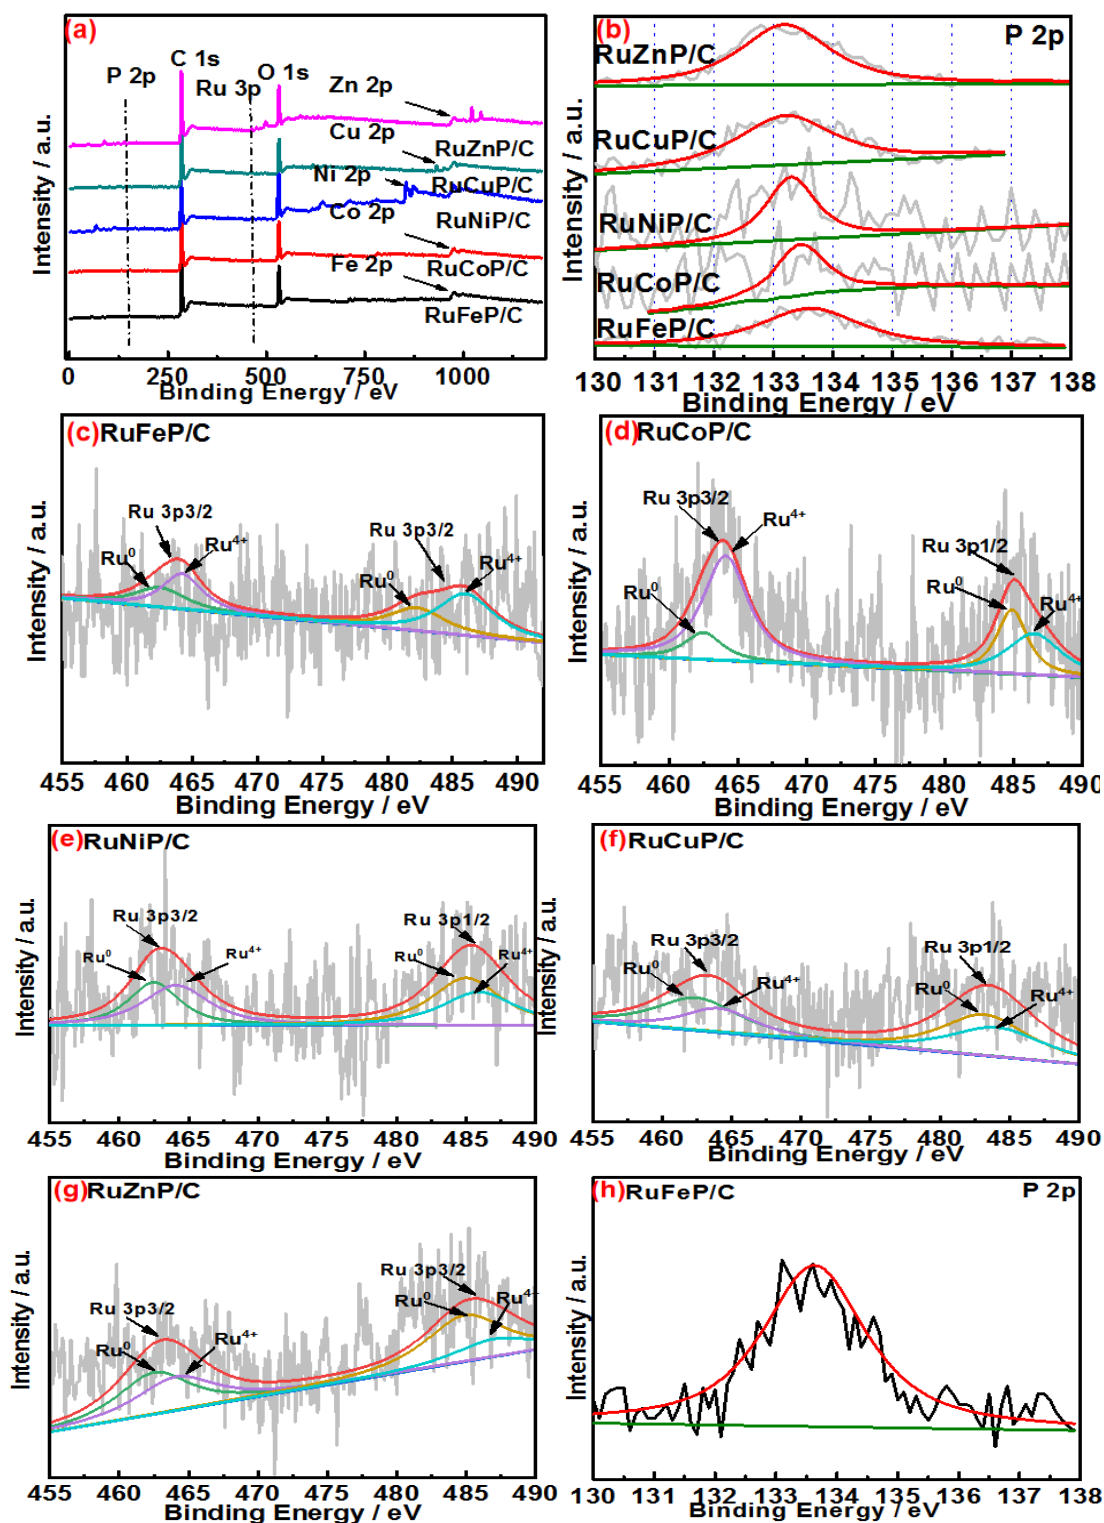

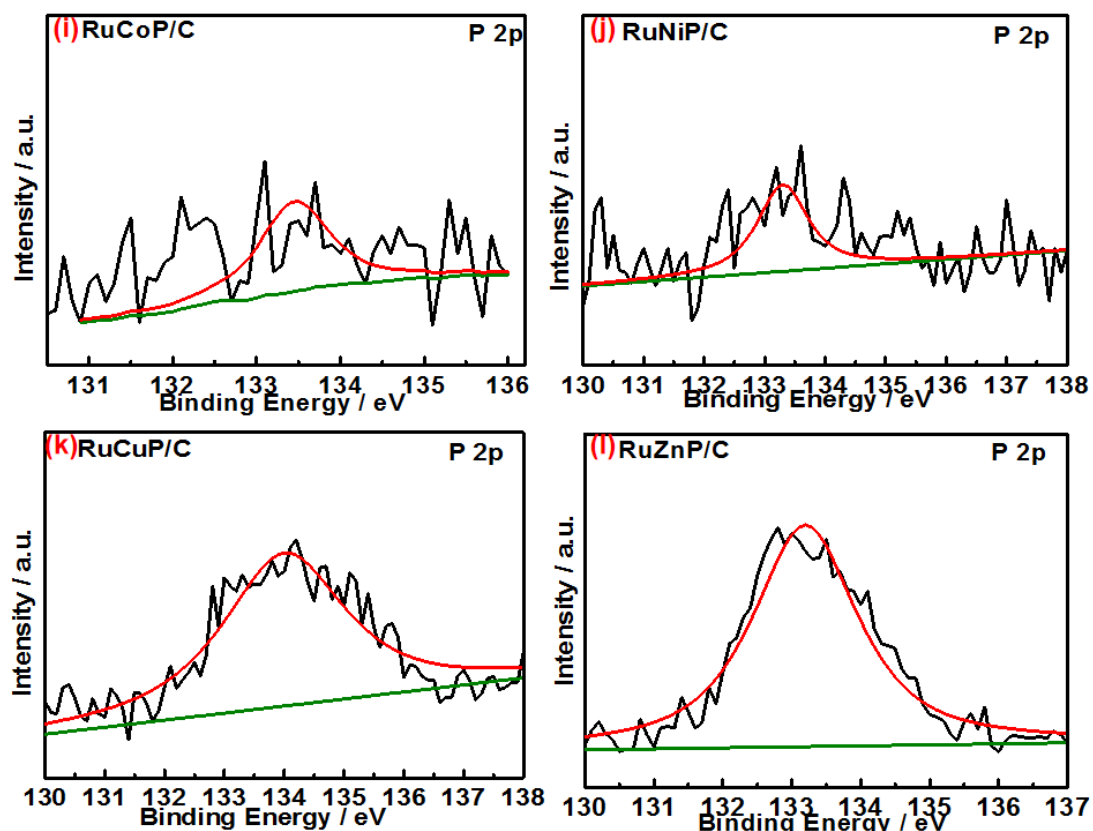

**Figure S2.** XPS survey spectra of all the alloys (a); P 2p XPS spectra of the different metal-doped alloy(b); Ru 3p XPS spectra of RuFeP(c), RuCoP(d) , RuNiP (e), RuCuP(f) and RuZnP(g) and P 2p XPS spectra of RuFeP(h) , RuCoP(i), RuNiP (j), RuCuP (k) and RuZnP (l).

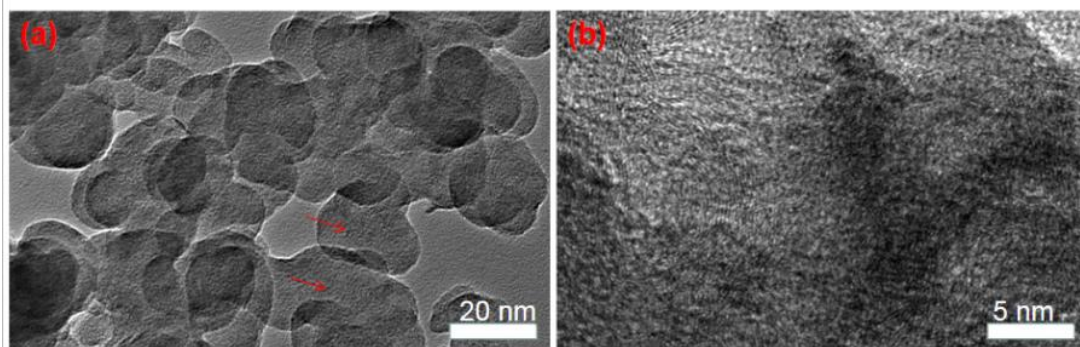

**Figure S3.** TEM images (a and b) of RuCoP/C.

**Table S1.** Assignments binding energies (BEs) and concentrations of Ru 3p species in as-prepared alloys from Ru 3p XPS spectra.

| Catalyst | Ru 3p            | BE <sup>a</sup> | Concentration <sup>b</sup> |
|----------|------------------|-----------------|----------------------------|
| RuFeP/C  | Ru <sup>0</sup>  | 462.5, 482.5    | 0.42                       |
|          | Ru <sup>4+</sup> | 464.5, 486      | 0.58                       |
| RuCoP/C  | Ru <sup>0</sup>  | 462.5, 485      | 0.53                       |
|          | Ru <sup>4+</sup> | 464, 486.5      | 0.47                       |
| RuNiP/C  | Ru <sup>0</sup>  | 462.5, 485      | 0.49                       |
|          | Ru <sup>4+</sup> | 464, 486        | 0.51                       |
| RuCuP/C  | Ru <sup>0</sup>  | 462.5, 483      | 0.63                       |
|          | Ru <sup>4+</sup> | 464, 484        | 0.37                       |
| RuZnP/C  | Ru <sup>0</sup>  | 462.5, 485      | 0.45                       |
|          | Ru <sup>4+</sup> | 464.5, 487.5    | 0.55                       |

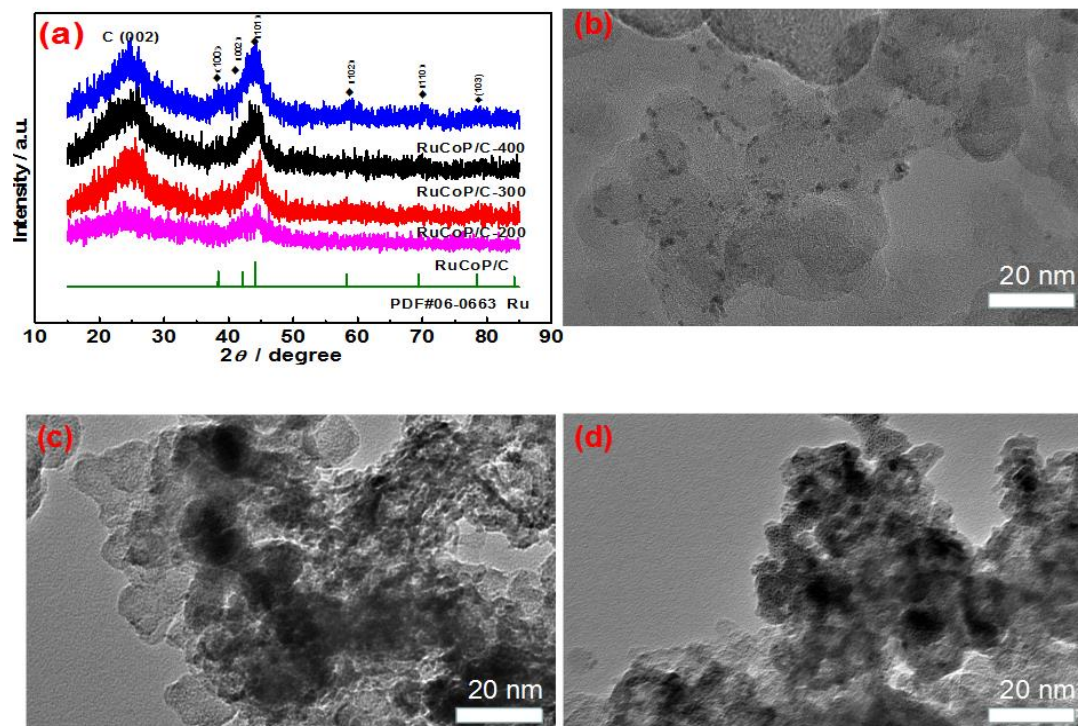

**Figure S4.** (a) XRD patterns of RuCoP samples heat-treated at different temperatures. TEM images of RuCoP/C-200(b), RuCoP/C-300 (c) and RuCoP/C-400 (d).

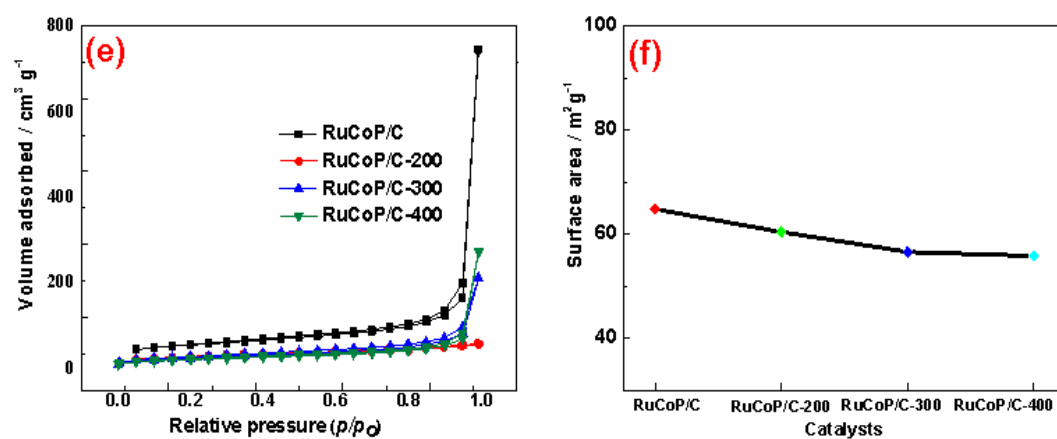

**Figure S5.** N<sub>2</sub> adsorption and desorption isotherm (e), and BET surface areas of RuCoP/C treated at various temperatures (f).
